# Supplementary material for: Rare coral under the genomic microscope: timing and relationships among Hawaiian Montipora
Source: PubMed Central journal article supplement (PMC6657087; doi:10.1186/s12862-019-1476-2), 2019-07-24
Supplement: 12862_2019_1476_MOESM3_ESM.pdf [file 12862_2019_1476_MOESM3_ESM.pdf]

**A**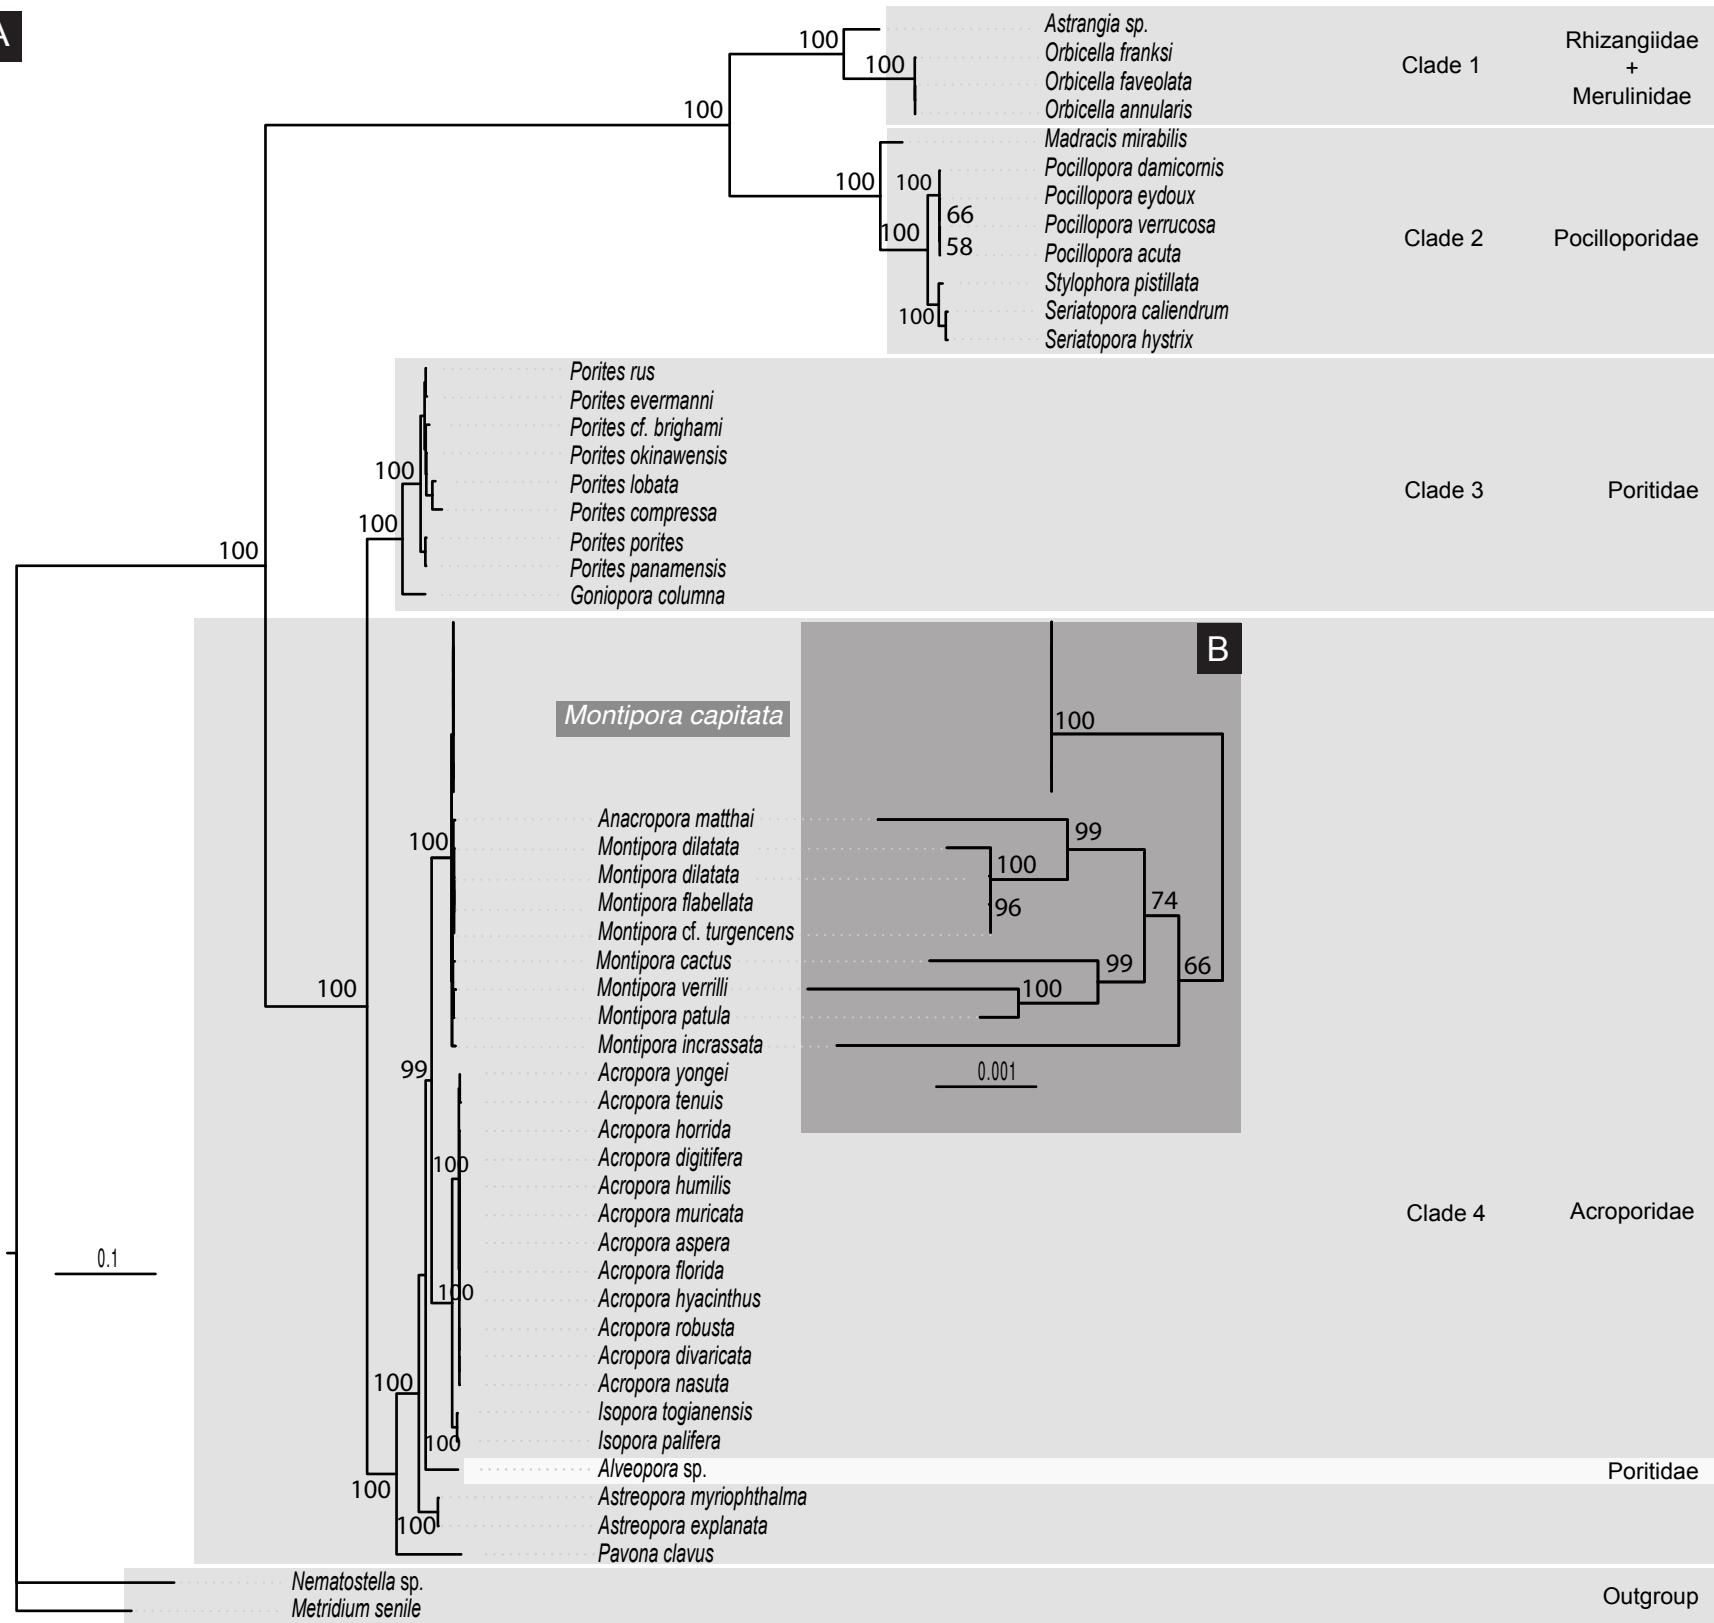**B**
