# Supplementary material for: Rare coral under the genomic microscope: timing and relationships among Hawaiian Montipora
Source: PubMed Central journal article supplement (PMC6657087; doi:10.1186/s12862-019-1476-2), 2019-07-24

Total loci = 67,598

*Montipora capitata*  
43,423

683

588

729

3,723

*Symbiodinium*  
*minutum*  
4,286

*Fugacium*  
*kawagutii*  
4,727

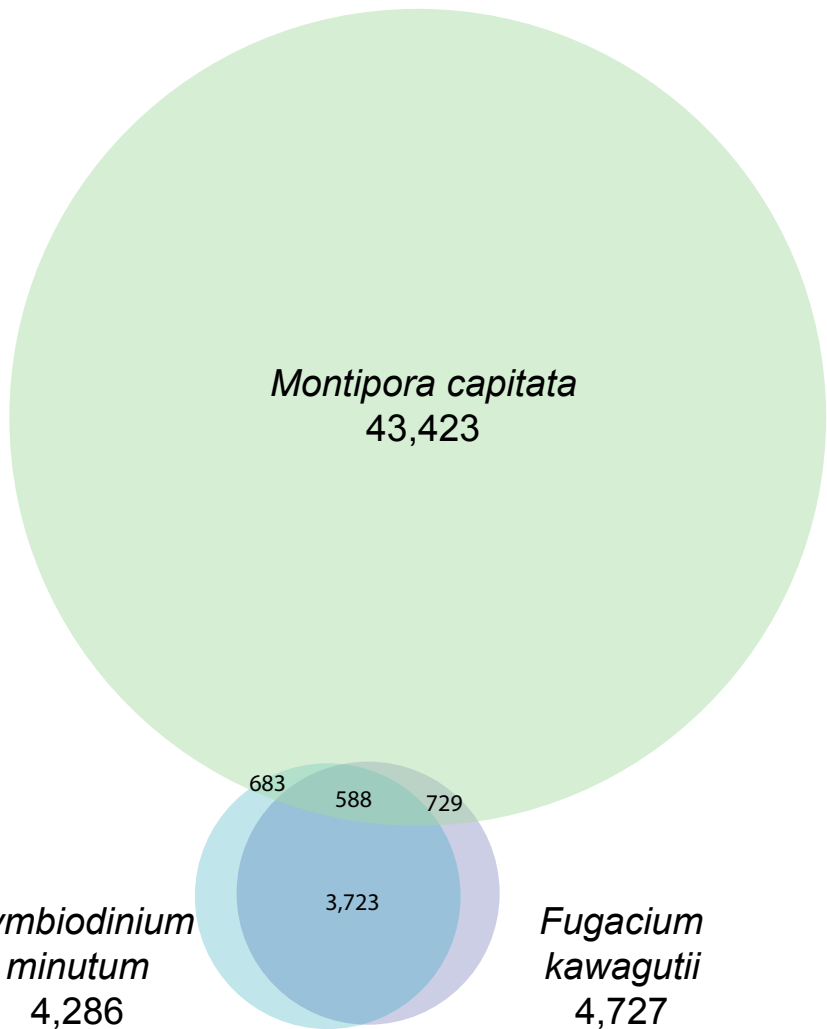

Supplement: 12862_2019_1476_MOESM6_ESM.pdf [file 12862_2019_1476_MOESM6_ESM.pdf]
